# Supplementary material
Source: publisher figshare collection journal article supplement (https://acs.figshare.com/ndownloader/files/4531765)
Supplement: Supplementary file 1 [file 4531765]

## **Supplementary Information**

**Title:** Bright” and “Dark” Excited States of an Alternating AT Oligomer Characterized by Femtosecond Broadband Spectroscopy

**Authors** Wai Ming Kwok,<sup>\*,†</sup> Chensheng Ma<sup>\*,‡</sup> and David Lee Phillips<sup>\*,‡</sup>

<sup>†</sup>*Department of Applied Biology and Chemical Technology, The Hong Kong*

<sup>‡</sup>*Polytechnic University, Hung Hom, Kowloon, Hong Kong, China and Department of Chemistry, The University of Hong Kong, Pokfulam Road, Hong Kong, China*

**Journal:** *Journal of Physical Chemistry B*

**Figure 1S** Melting curve of d(AT)<sub>10</sub> in the pH6.85 buffered aqueous solution S2

**Figure 2S** Overview of the TRF spectra obtained for an equal molar A+T mixture with 267 nm photo-excitation S2

**Figure 3S** Overview of the TRF spectra obtained for d(AT)<sub>10</sub> with 267 nm photo-excitation S2

**Figure 4S** Overview of the TA spectra obtained for an equal molar A+T mixture with 267 nm photo-excitation S3

**Figure 5S** Overview of the TA spectra obtained for d(AT)<sub>10</sub> with 267 nm photo-excitation S3

**Figure 6S** Examples of fs-TA and fs-TRF spectra of Ado and dT used for the decomposition of the correlated transient A+T spectra. S4

**Figure 7S** Time dependence of TA and TRF for A+T mixture at various wavelengths and related descriptions. S5

**Table 1S** Time-constants and weighting factors resulted from dynamic fitting of the TA and TRF time-dependence data in Figure 7S. S5-6

**Figure 8S** Time dependence of TA and TRF for d(AT)<sub>10</sub> at various wavelengths and related illustration. S6

**Table 2S** Weighting factors resulted from global fittings of the TA and TRF time-dependence data in Figure 8S. S7

**Figure 9S** Log-normal fitting of the representative transient TRF spectra of d(AT)<sub>10</sub>. S7

**Table 3S** Spectral parameters obtained from log-normal simulations of the UV-Vis absorption and the three fluorescence components of d(AT)<sub>10</sub>. S8

**References** S8

**Figure 1S** Melting curve of d(AT)<sub>10</sub> in the pH 6.85 buffered aqueous solution

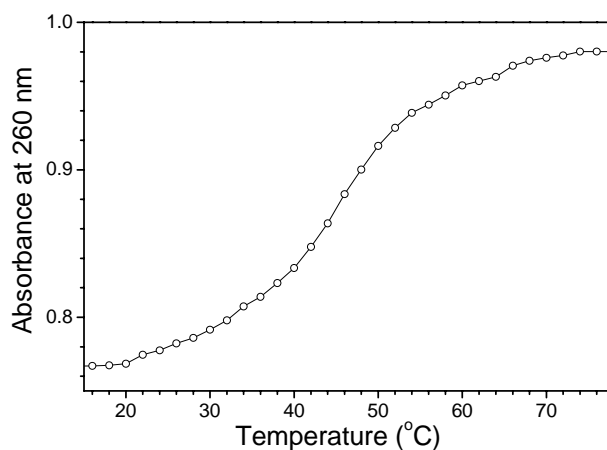

**Figure 2S** Overview (a) and 50 times enlarged ((b) for delay time from 1.4 ps to 3.75 ps)  
TRF spectra obtained for equal molar A+T mixture with 267 nm excitation

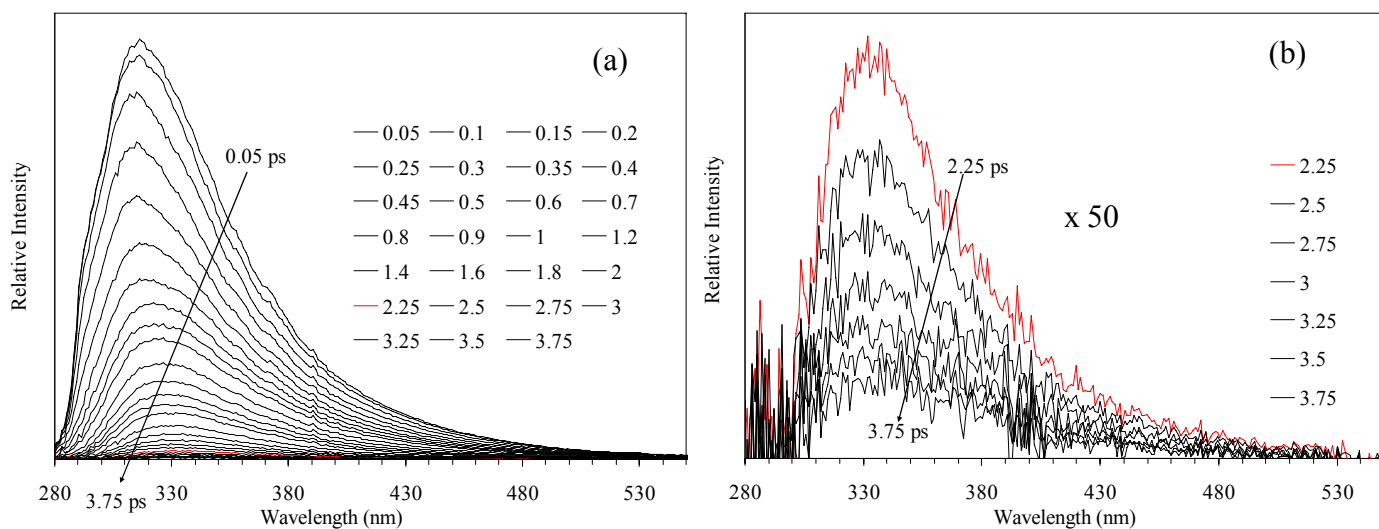

**Figure 3S** Overview (a) and 23 times enlarged ((b) for delay time from 1.4 ps to 250 ps)  
TRF spectra obtained for d(AT)<sub>10</sub> with 267 nm excitation

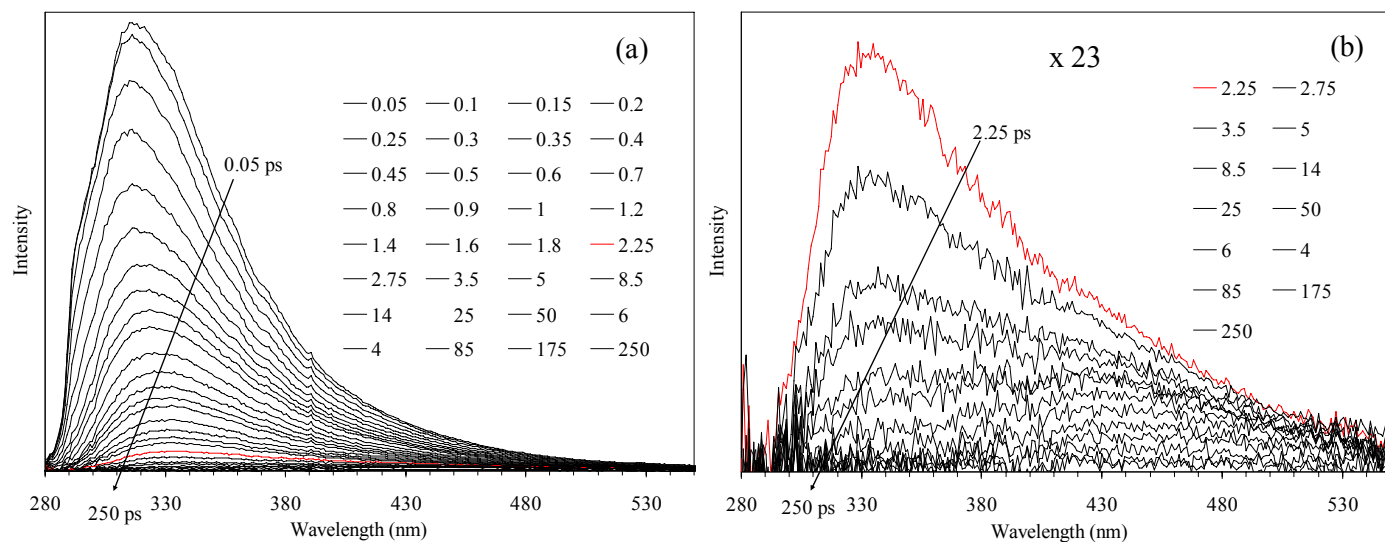

**Figure 4S** Overview of the TA spectra obtained for A+T mixture with 267 nm excitation

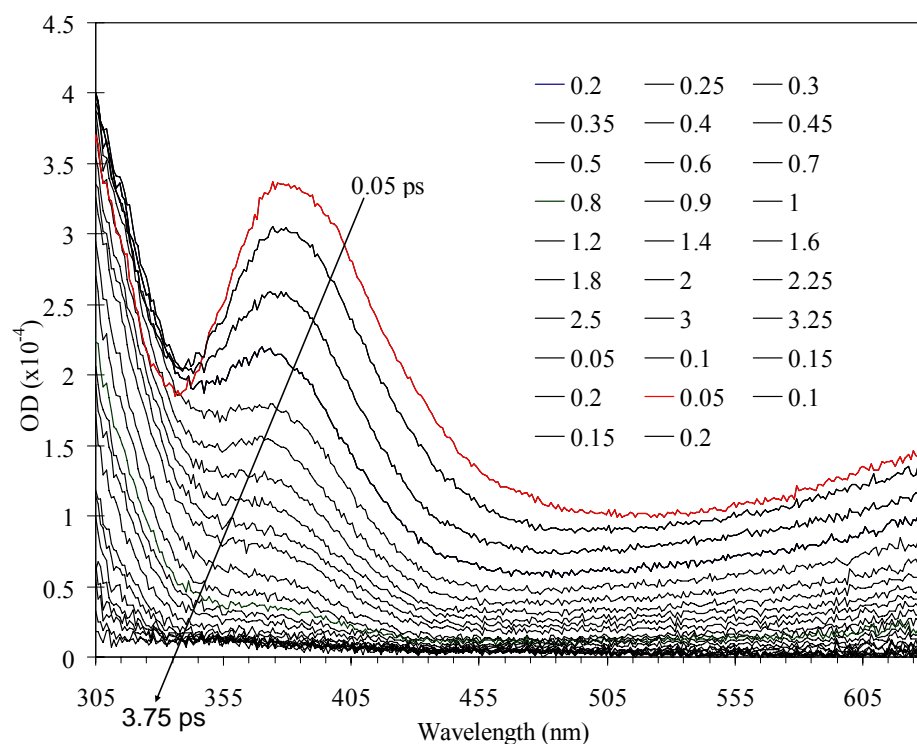

**Figure 5S** Overview of the TA spectra obtained for d(AT)<sub>10</sub> with 267 nm excitation

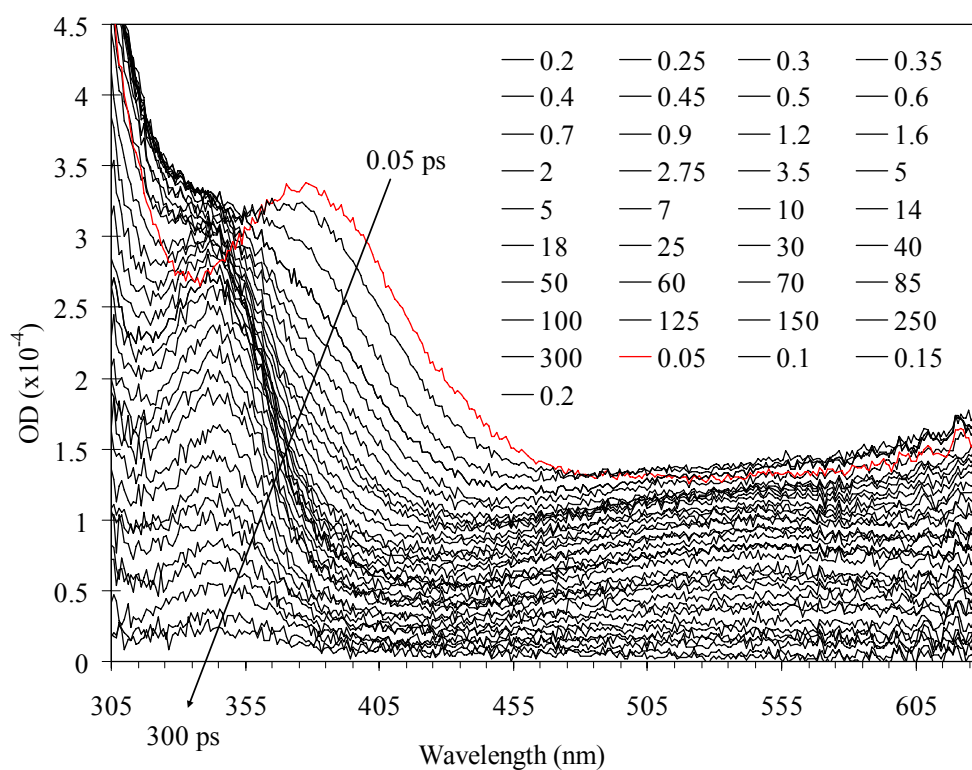

**Figure 6S** Examples of fs-TA (a, b) and fs-TRF (c, d) spectra of Ado<sup>[1]</sup> and dT<sup>[2]</sup> obtained under similar experimental conditions as those for the A+T and d(AT)<sub>10</sub> measurements herein. After weighted by the absorption proportional factors (0.54 for Ado and 0.46 for dT), these spectra were used to decompose the TA and TRF transient spectra of the corresponding time delays recorded for the A+T mixture (Figure 1 in the main text). It is worthwhile to note the distinct spectral and dynamics features displayed, respectively, by the Ado and dT spectra.

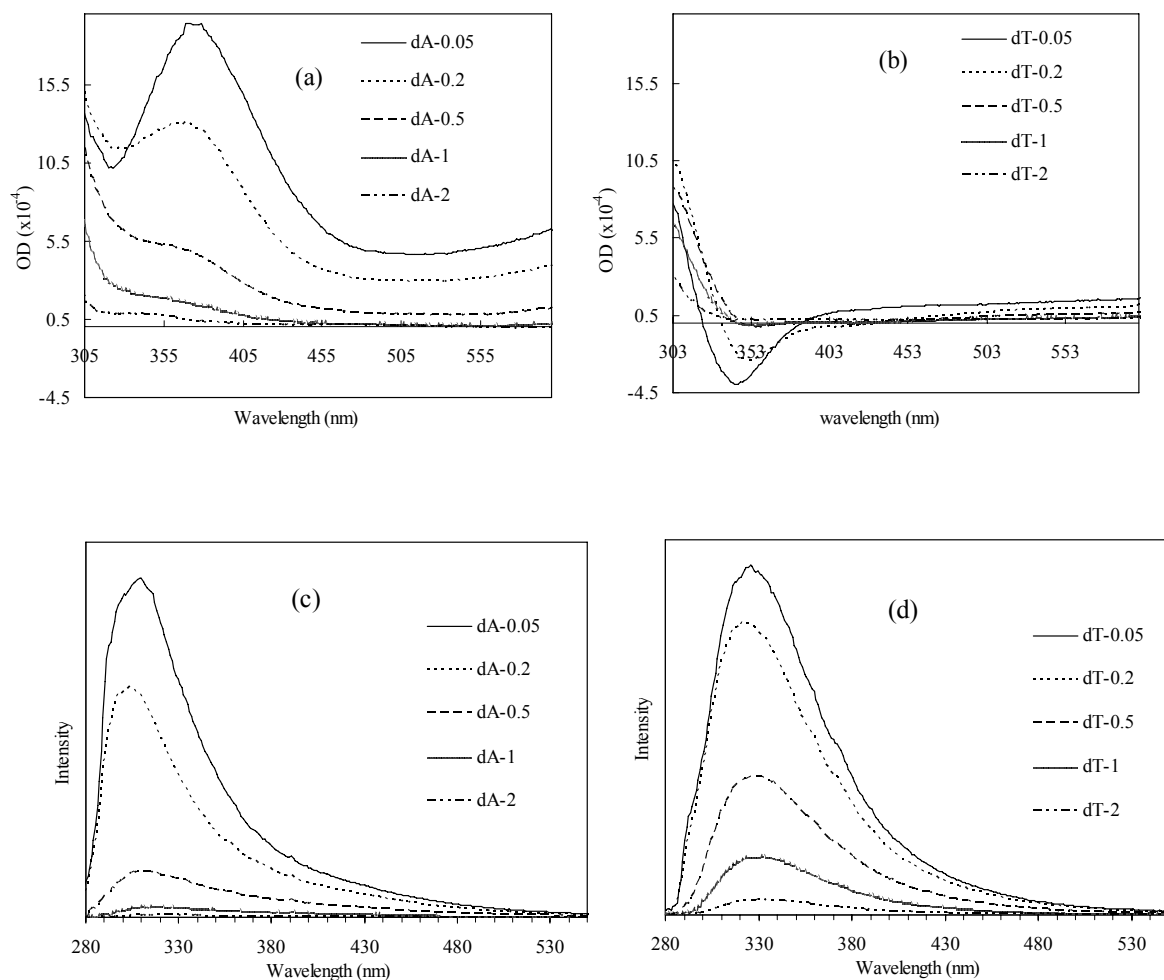

**Figure 7S** Normalized time dependence of TA (a) and TRF (b) for A+T mixture at various indicated wavelengths resulted from the TA and TRF spectra in Figure 2, Figure 1S and 3S. The data points are from the experimental measurements and solid lines represent kinetic fittings resulted from simulation by using two exponential functions ( $a_1\exp(-t/\tau_1) + a_2\exp(-t/\tau_2)$ ) convoluted with the IRF of the TA or TRF measurements.

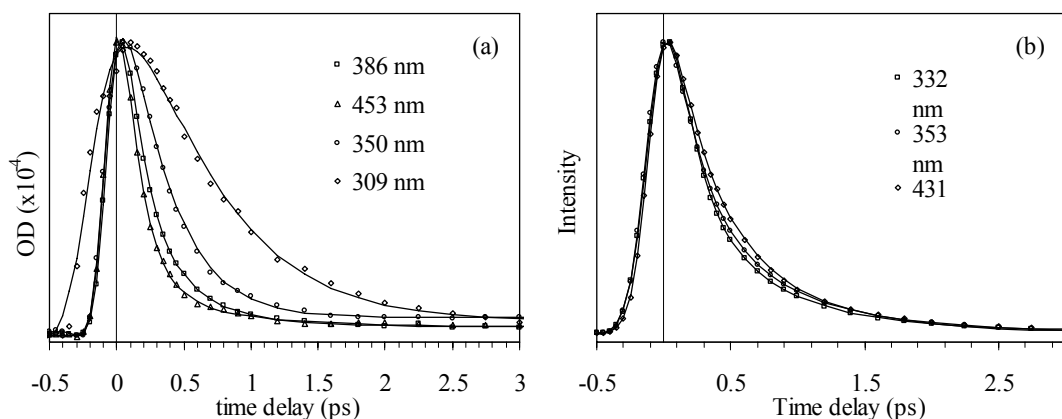

For all the fittings, the resulted two time constants are similar,  $\sim 0.13$ – $0.22$  ps for  $\tau_1$  and  $\sim 0.46$ – $0.74$  ps for  $\tau_2$ , but associated with different weighting factors ( $a_1$ ,  $a_2$ ) depending on the wavelength examined. For the time profiles shown in the figure, the associated fitting time-constants and weighting factors are listed below in **Table 1S**

**Table 1S** Fitting parameters for the time-dependences of TA and TRF results displayed in Figure 6S. The  $\chi^2$  stands for the Mean Square Deviation of the fittings. All the time profiles are normalized to 1 before the fittings.

| TA                  |               |       |               |       |       |                               |
|---------------------|---------------|-------|---------------|-------|-------|-------------------------------|
|                     | $\tau_1$ (ps) | $a_1$ | $\tau_2$ (ps) | $a_2$ | $a_3$ | $\chi^2$ ( $\times 10^{-5}$ ) |
| 350 nm <sup>a</sup> | 0.14          | 0.52  | 0.46          | 0.46  | 0.03  | 9.0                           |
| 386 nm              | 0.17          | 0.82  | 0.46          | 0.18  |       | 2.5                           |
| 453 nm              | 0.15          | 0.92  | 0.67          | 0.08  |       | 6.5                           |

  

| TRF    |            |       |            |       |                               |
|--------|------------|-------|------------|-------|-------------------------------|
|        | $t_1$ (ps) | $a_1$ | $t_2$ (ps) | $a_2$ | $\chi^2$ ( $\times 10^{-5}$ ) |
| 332 nm | 0.18       | 0.73  | 0.69       | 0.27  | 0.9                           |
| 353 nm | 0.22       | 0.69  | 0.74       | 0.31  | 0.8                           |
| 431 nm | 0.22       | 0.47  | 0.58       | 0.53  | 1.5                           |

<sup>a</sup>The  $a_3$  value corresponds to the contribution of the residual signal at time delay  $> 3$  ps at this particular wavelength. The signal has been associated with absorption from dT triplet as discussed in the main text.

The excited-state decays of A<sup>•</sup>do and dT are both featured by two exponential dynamics due to involvement of two excited-states, i.e., the  $L_a$  ( $\pi\pi^*$ ) and  $L_b$  ( $\pi\pi^*$ ) for

Ado<sup>[1]</sup> and  $\pi\pi^*$  and  $n\pi^*$  for dT.<sup>[2]</sup> The correlated two time constants are similar but slightly slower for dT than Ado (0.13 ps and 0.45 ps for Ado; 0.15 ps and 0.76 ps for dT).<sup>2,6</sup> This plus the different spectral characters of the Ado and dT TA and TRF spectra (Figure 6S) account for the wavelength dependent two exponential decays of the TA and TRF results shown in the above figures.

The distinctive TA profile at  $\sim 309$  nm (Figure 6S(a)) that shows a substantial long  $\sim 0.9$  ps decay is due to the additional repopulation of the  $S_0$  by the prompt excited-state IC deactivations and the ensuing cooling of this vibrationally hot  $S_0$ .<sup>[1,2,3]</sup> The IC dumps most of the absorbed 267 nm photo-energy into the just recovered  $S_0$  molecules making them vibrationally highly excited and they consequently exhibit a transient absorption at wavelengths slightly beyond the red-edge of their thermal equilibrium  $S_0$  absorption (Figure 1 S).<sup>[3,4]</sup> The hot  $S_0$  molecules then gradually transfer the excess vibrational energy into the surrounding medium to re-establish the thermal equilibrium with the surrounding environment. For nucleobases, such a vibrational cooling (VC) process is signified by the wavelength dependent TA decay profiles at a wavelength region below  $\sim 330$  nm and crossing the lowest  $S_0$  absorption band. The slower 309 nm TA decay seen here (correlated with a  $\sim 0.9$  ps time constant) is an indication of the VC process of the 267 nm excited A+T; The TA dynamics at the other longer wavelengths (Figure 6S(a)) and the TRF profiles (Figure 6S(b)) are due to relaxation and deactivation dynamics of Ado and dT excited-states.

**Figure 8S** Normalized time dependence of TA (a) and TRF (b) for the d(AT)<sub>10</sub> at various indicated wavelengths obtained from the TA and TRF spectra in Figure 3, Figure 2S and 4S.

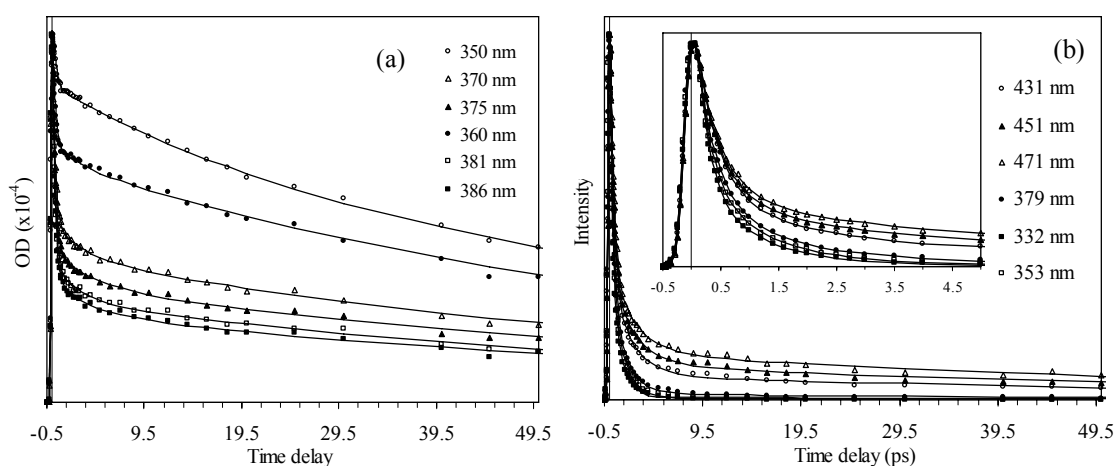

The data points are from the experimental measurements and solid lines represent kinetic fittings from simulation using three exponential function ( $a_1\exp(-t/\tau_1) + a_2\exp(-t/\tau_2) + a_3\exp(-t/\tau_3)$ ) convoluted with the IRF of the TA or TRF measurements.

The insert in (b) shows the corresponding dynamics at early time delays. The fittings for the TA and TRF dynamics result in the similar set of time constants, that is  $0.3 \pm 0.03$  ps for the  $\tau_1$ ,  $3.0 \pm 0.5$  ps for the  $\tau_2$  and  $72 \pm 2$  ps for the  $\tau_3$ , for the three exponential components but with varying weighting factors depending on the wavelength examined. The weighting factors resulted for each of the fittings displayed in Figure 7S(a) and (b) are listed in **Table 2S** as the following.

**Table 2S** Fitting parameters for the time-dependences of TA and TRF results displayed in Figure 7S. The  $\chi^2$  stands for the Mean Square Deviation of the fittings. All the time profiles are normalized to 1 before the fittings.

| TA     |       |       |       |                     |
|--------|-------|-------|-------|---------------------|
|        | $a_1$ | $a_2$ | $a_3$ | $\chi^2 (x10^{-5})$ |
| 386 nm | 0.784 | 0.064 | 0.152 | 3.9                 |
| 350 nm | 0.255 | 0.064 | 0.681 | 16.4                |
| 370 nm | 0.661 | 0.071 | 0.268 | 6.6                 |
| 375 nm | 0.732 | 0.066 | 0.202 | 4.5                 |
| 360 nm | 0.494 | 0.038 | 0.468 | 11.0                |
| 381 nm | 0.757 | 0.069 | 0.174 | 2.8                 |

  

| TRF    |       |       |       |                     |
|--------|-------|-------|-------|---------------------|
|        | $a_1$ | $a_2$ | $a_3$ | $\chi^2 (x10^{-5})$ |
| 471 nm | 0.731 | 0.178 | 0.091 | 2.7                 |
| 451 nm | 0.746 | 0.187 | 0.067 | 1.9                 |
| 431 nm | 0.749 | 0.204 | 0.046 | 1.1                 |
| 379 nm | 0.755 | 0.234 | 0.011 | 0.9                 |
| 353 nm | 0.743 | 0.253 | 0.004 | 1.1                 |
| 332 nm | 0.823 | 0.176 | 0.002 | 5.7                 |

**Figure 9S** Log-normal fitting of the representative transient TRF spectra of d(AT)<sub>10</sub>. The 5 ps transient spectrum was simulated by weighted superposition of the S<sub>G</sub> and S<sub>E</sub> spectra that was obtained from fitting of the 1.4 ps and 18 ps experimental spectra, respectively.

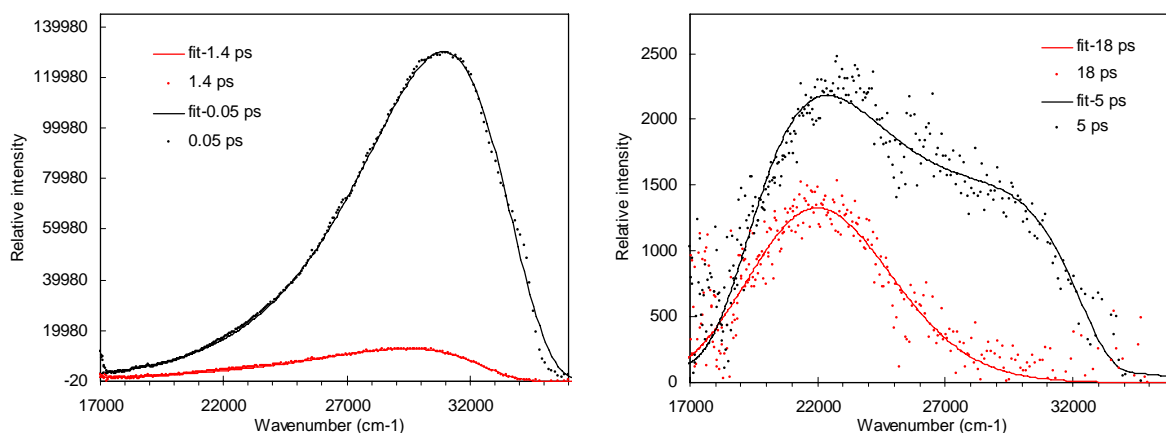

The log-normal function follows:

$$F(\nu) = h \begin{cases} \exp[-\ln(2)\{\ln(1+\alpha)/\gamma\}^2] & \alpha > -1 \\ 0 & \alpha \leq -1 \end{cases} \dots\dots\dots(\text{eq 1})$$

$$\alpha \equiv 2\gamma(\nu - \nu_p)/\Delta$$

Where  $h$  is the peak height,  $\nu_p$  the peak frequency,  $\gamma$  the asymmetry parameter and  $\Delta$  the width parameter are adjusted to simulate the spectral profile of a fluorescence or absorption spectrum.

**Table 3S** Spectral parameters obtained by log-normal simulation of the UV-Vis absorption and the three fluorescence component spectra (the 0.05 ps, 1.4 ps, and 18ps spectra in Figure 3 in the main text) of d(AT)<sub>10</sub> oligomer.

|                                  | UV-abs | Transient fluorescence |        |       |
|----------------------------------|--------|------------------------|--------|-------|
|                                  |        | 0.05 ps                | 1.4 ps | 20 ps |
| $\gamma$                         | 0.2    | -0.4                   | -0.6   | 0.3   |
| $\nu_p$ (cm <sup>-1</sup> )      | 38110  | 30910                  | 29428  | 21820 |
| $\Delta$ (cm <sup>-1</sup> )     | 5223   | 6846                   | 7837   | 6114  |
| Stokes shift (cm <sup>-1</sup> ) |        | 7200                   | 8682   | 16290 |

## References

- [1] W.-M. Kwok, C. Ma, D. L. Phillips, *J. Am. Chem. Soc.* **2006**, *128*, 11894-11905.
- [2] W.-M. Kwok, C. Ma, D. L. Phillips, *J. Am. Chem. Soc.* **2008**, *130*, 5131-5139.
- [3] J. L. Pecourt, J. Peon, B. Kohler, *J. Am. Chem. Soc.* **2001**, *123*, 10370-10378.
- [4] R. J. Sension, S. T. Repinec, R. M. Hochstrasser, *J. Chem. Phys.* **1990**, *93*, 9185-9188.
